# Supplementary material for: Construction of Cnts/calcined Zn-Co-LDHs hydrid to enhanced photocatalytic for ofloxacin decomposition: mechanism, degradation pathway, and toxicity assessment
Source: Royal Society of Chemistry journal article supplement (doi:10.1039/d4ra06153e), 2024-01-01
Supplement: d4ra06153e1.pdf [file d4ra06153e1.pdf]

### Supplementary information

**Table 1.** Band gap energy ( $E_g$ ) of ZnC and 6Cnt@ZnC samples.

|           | Bandgap (eV) | $E_{cb}$ (eV) | $E_{vb}$ (eV) |
|-----------|--------------|---------------|---------------|
| ZnC       | 3.1          | -0.26         | 2.84          |
|           | 2.2          | -0.66         | 1.54          |
| 6Cnst@ZnC | 2.9          | -0.16         | 2.74          |
|           | 1.78         | -0.45         | 1.33          |

**Table 2.** Physicochemical properties of compound (6)

| Property         | Value   | Comment                                              |
|------------------|---------|------------------------------------------------------|
| Molecular Weight | 273.13  | Contain hydrogen atoms. Optimal:100-600              |
| Volume           | 268.436 | Van der Waals volume                                 |
| nHA              | 4       | Number of hydrogen bond acceptors.<br>Optimal:0-12   |
| nHD              | 0       | Number of hydrogen bond donors.<br>Optimal:0-7       |
| nRot             | 1       | Number of rotatable bonds. Optimal:0-11              |
| MaxRing          | 11      | Number of atoms in the biggest ring.<br>Optimal:0-18 |
| nHet             | 5       | Number of heteroatoms. Optimal:1-15                  |
| fChar            | 0       | Formal charge. Optimal: -4-~4                        |
| nRig             | 20      | Number of rigid bonds. Optimal:0-30                  |
| Flexibility      | 0.05    | Flexibility =nRot /nRig                              |
| Stereo Centers   | 0       | Optimal: $\leq 2$                                    |

|      |        |                                                              |
|------|--------|--------------------------------------------------------------|
| TPSA | 20.64  | Topological Polar Surface Area. Optimal: 0-140               |
| logS | -3.669 | Log of the aqueous solubility. Optimal: -4-0.5 log mol/L     |
| LogP | 2.704  | Log of the octanol/water partition coefficient. Optimal: 0-3 |
| logD | 2.361  | logP at physiological pH 7.4. Optimal: 1-3                   |

**Table 3.** Medicinal Chemistry of compound (6)

| Property         | Value    | Comment                                                                                                                                                                           |
|------------------|----------|-----------------------------------------------------------------------------------------------------------------------------------------------------------------------------------|
| QED              | 0.786    | A measure of drug-likeness based on the concept of desirability; Attractive: > 0.67; unattractive: 0.49~0.67; too complex: < 0.34                                                 |
| SAscore          | 3.746    | Synthetic accessibility score is designed to estimate ease of synthesis of drug-like molecules. SAscore $\geq$ 6, difficult to synthesize; SAscore < 6, easy to synthesize.       |
| Fsp <sup>3</sup> | 0.467    | The number of sp <sup>3</sup> hybridized carbons / total carbon count, correlating with melting point and solubility. Fsp <sup>3</sup> $\geq$ 0.42 is considered a suitable value |
| MCE-18           | 50.909   | MCE-18 stands for medicinal chemistry evolution. MCE-18 $\geq$ 45 is considered a suitable value.                                                                                 |
| NPscore          | -0.547   | Natural product-likeness score. This score is typically in the range from -5 to 5. The higher the score is, the higher the probability is that the molecule is a NP               |
| Lipinski Rule    | Accepted | MW $\leq$ 500; logP $\leq$ 5; Hacc $\leq$ 10; Hdon $\leq$ 5; If two properties are out of range, a poor absorption or permeability is possible, one is acceptable.                |
| Pfizer Rule      | Accepted | logP > 3; TPSA < 75; Compounds with a high log P (>3) and low TPSA (<75) are likely to be toxic.                                                                                  |
| GSK Rule         | Accepted | MW $\leq$ 400; logP $\leq$ 4; Compounds satisfying the GSK rule                                                                                                                   |

| Property        | Value    | Comment                                                                                                                                |
|-----------------|----------|----------------------------------------------------------------------------------------------------------------------------------------|
|                 |          | may have a more favorable ADMET profile                                                                                                |
| Golden Triangle | Accepted | $00 \leq MW \leq 50$ ; $-2 \leq \log D \leq 5$ ; Compounds satisfying the Golden Triangle rule may have a more favorable ADMET profile |
| PAINS           | 0 alerts | Pan Assay Interference Compounds, frequent hitters, Alpha-screen artifacts and reactive compound.                                      |
| ALARM NMR       | 0 alerts | Thiol reactive compounds                                                                                                               |
| BMS             | 0 alerts | Undesirable, reactive compounds                                                                                                        |
| Chelator Rule   | 0 alerts | Chelating compounds                                                                                                                    |

**Table 4.** The properties of the drug metabolism of compound (6)

| Property          | Value | Comment                                                                                                   |
|-------------------|-------|-----------------------------------------------------------------------------------------------------------|
| CYP1A2 inhibitor  | 0.896 | Category 1: Inhibitor; Category 0: Non-inhibitor; The output value is the probability of being inhibitor  |
| CYP1A2 substrate  | 0.858 | Category 1: Substrate; Category 0: Non-substrate. The output value is the probability of being substrate  |
| CYP2C19 inhibitor | 0.47  | Category 1: Inhibitor; Category 0: Non-inhibitor. The output value is the probability of being inhibitor  |
| CYP2C19 Substrate | 0.932 | Category 1: Substrate; Category 0: Non-substrate; The output value is the probability of being substrate  |
| CYP2C9 inhibitor  | 0.114 | Category 1: Inhibitor; Category 0: Non-inhibitor. The output value is the probability of being inhibitor. |
| CYP2C9 substrate  | 0.708 | Category 1: Substrate; Category 0: Non-substrate;                                                         |

| Property         | Value | Comment                                                                                                   |
|------------------|-------|-----------------------------------------------------------------------------------------------------------|
|                  |       | The output value is the probability of being substrate.                                                   |
| CYP2D6 inhibitor | 0.492 | Category 1: Inhibitor; Category 0: Non-inhibitor; The output value is the probability of being inhibitor. |
| CYP2D6 Substrate | 0.919 | Category 1: Substrate; Category 0: Non-substrate; The output value is the probability of being substrate  |
| CYP3A4 inhibitor | 0.143 | Category 1: Inhibitor; Category 0: Non-inhibitor; The output value is the probability of being inhibitor  |
| CYP3A4 Substrate | 0.831 | Category 1: Substrate; Category 0: Non-substrate; The output value is the probability of being substrate  |

**Table 5.** The properties of the drug excretion of compound (6)

| Property | Value | Comment                                                                                                                                                             |
|----------|-------|---------------------------------------------------------------------------------------------------------------------------------------------------------------------|
| CL       | 6.709 | Clearance; High: >15 mL/min/kg; moderate: 5-15 mL/min/kg; low: <5 mL/min/kg                                                                                         |
| T1/2     | 0.07  | Category 1: long half-life ; Category 0: short; half-life; long half-life: >3h; short half-life: <3h; The output value is the probability of having long half-life. |

**Table 6.** The properties of the drug toxicity of compound (6)

| Property      | Value | Comment                                                                       |
|---------------|-------|-------------------------------------------------------------------------------|
| Herg Blockers | 0.54  | Category 1: active; Category 0: inactive; The output value is the probability |
| H-HT          | 0.899 | Human Hepatotoxicity; Category 1: H-HT positive                               |

|                         |       |                                                                                                                                                                    |
|-------------------------|-------|--------------------------------------------------------------------------------------------------------------------------------------------------------------------|
|                         |       | (+); Category 0: H-HT negative (-); The output value is the probability of                                                                                         |
| DILI                    | 0.942 | Drug Induced Liver Injury. Category 1: drugs with a high risk of DILI; Category 0: drugs with no risk of DILI. The output value is the probability of being toxic. |
| Rat Oral Acute Toxicity | 0.542 | Category 0: low-toxicity; Category 1: high-toxicity; The output value is the probability of being highly toxic                                                     |
| FDAMDD                  | 0.322 | Maximum Recommended Daily Dose; Category 1: FDAMDD (+); Category 0: FDAMDD (-); The output value is the probability of being positive.                             |
| Skin Sensitization      | 0.732 | Category 1: Sensitizer; Category 0: Non-sensitizer; The output value is the probability of being sensitizer.                                                       |
| Carcinogenicity         | 0.906 | Category 1: carcinogens; Category 0: non-carcinogens; The output value is the probability of being toxic.                                                          |
| Eye corrosion           | 0.003 | Category 1: corrosives; Category 0: noncorrosives; The output value is the probability of being corrosives                                                         |
| Eye irritation          | 0.012 | Category 1: irritants; Category 0: nonirritants; The output value is the probability of being irritants.                                                           |
| Respiratory Toxicity    | 0.94  | Category 1: respiratory toxicants; Category 0: respiratory nontoxicants; The output value is the probability of being toxic.                                       |

**Table 7.** The properties of the environmental toxicity of compound (6)

| <b>Property</b>             | <b>Value</b> | <b>Comment</b>                                                                                                                                                                                          |
|-----------------------------|--------------|---------------------------------------------------------------------------------------------------------------------------------------------------------------------------------------------------------|
| Bioconcentration<br>Factors | 1.713        | Bioconcentration factors are used for considering secondary poisoning potential and assessing risks to human health via the food chain. The unit is - $\log_{10}[(\text{mg/L})/(1000 \cdot \text{MW})]$ |
| IGC <sub>50</sub>           | 3.06         | Tetrahymena pyriformis 50 percent growth inhibition concentration; The unit is - $\log_{10}[(\text{mg/L})/(1000 \cdot \text{MW})]$ .                                                                    |
| LC <sub>50</sub> FM         | 4.397        | 96-hour fathead minnow 50 percent lethal concentration; The unit is - $\log_{10}[(\text{mg/L})/(1000 \cdot \text{MW})]$ .                                                                               |
| LC <sub>50</sub> DM         | 6.089        | 48-hour daphnia magna 50 percent lethal concentration; The unit is - $\log_{10}[(\text{mg/L})/(1000 \cdot \text{MW})]$ .                                                                                |
